# Supplementary material for: Shorter Ice Duration and Changing Phenology Influence Under‐Ice Lake Temperature Dynamics
Source: PubMed Central journal article supplement (PMC11584988; doi:10.1029/2024jg008382), 2024-11-23
Supplement: JGRG-129-0-s001.pdf [file JGRG-129-0-s001.pdf]

## Supplemental materials

**Title:** Shorter ice duration and changing phenology influence under-ice lake temperature dynamics

**Running head:** Changing under-ice temperature dynamics

**Author names:** Isabella A. Oleksy<sup>\*a</sup>, David C. Richardson<sup>b</sup>

**Sequential standard deviation windows:** To assess changing variability of ice phenology, we evaluated 3 to 13-year windows of ice-on, ice-off, and ice duration for sequential windows as follows. First, we identified  $Y$  different series of standard deviations ( $Y$  years where  $Y=3,\dots,13$ ) starting with 1932 through  $1932+Y-1$ , beyond which the windows would repeat. Next, for each series, we calculated the standard deviation for sequential windows of  $Y$  years. For example, there are four unique versions of the 4-year windows (Fig. S1), nine unique versions of the 9-year windows (Fig. S2), and 13 unique versions of the 13-year windows (Fig. S3). For the 4-year sequential windows, the first version would start in 1932 with standard deviations calculated for 4-year sequential windows: 1932-1936, 1937-1941, etc..., the second version would start in 1933: 1933-1937, 1938-1942, etc... To determine if variability is increasing for each window size, we calculated the Theil-Sens slope and intercept. Ultimately, shorter windows had the most sequential standard deviation windows possible but the least number of unique versions. The 13-year window had only 5 or 6 different sequential standard deviation calculations but the most unique versions. To balance these two factors, we used 9-year windows for both analyses.

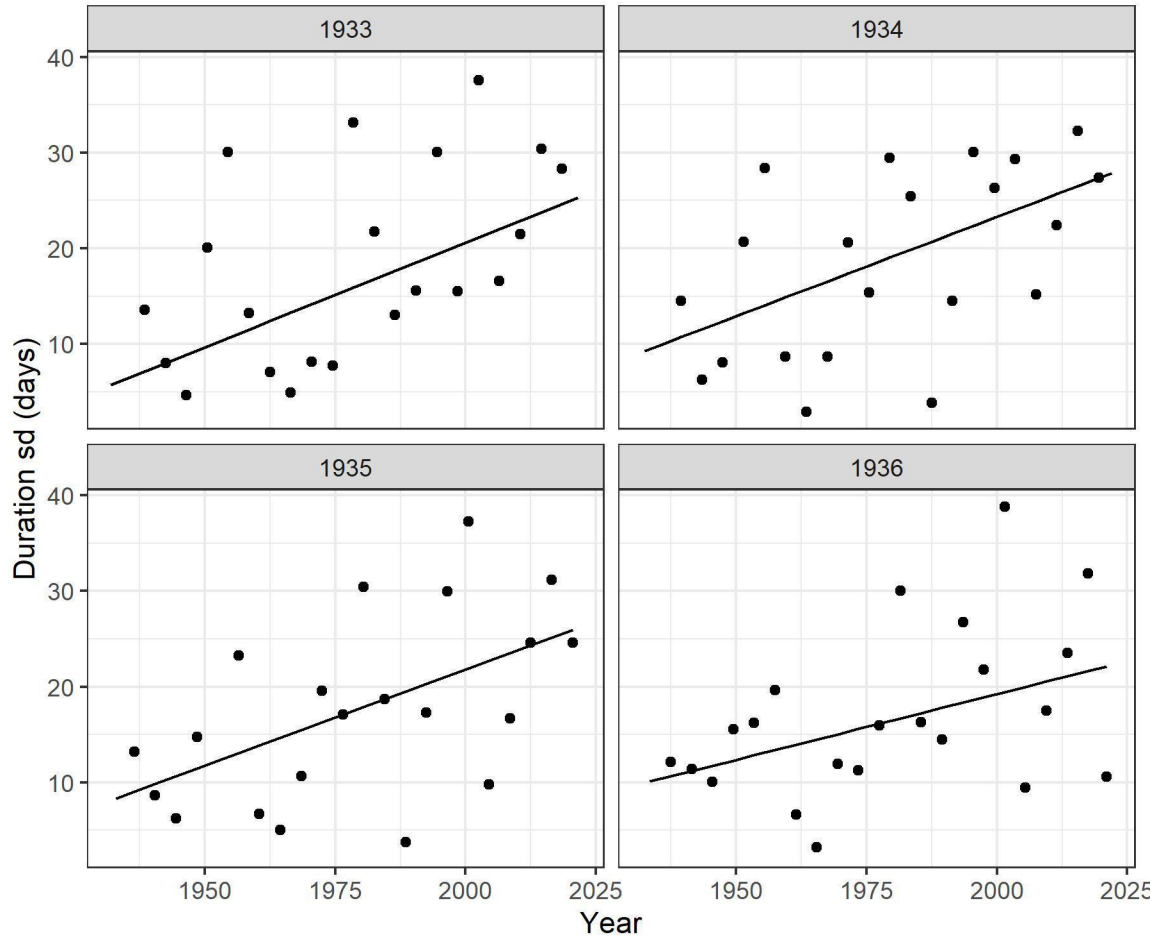

**Figure S1.** Standard deviations for all possible 4-year sequential windows where the year in each panel's title indicates the start year of the first segment. Additional sequential windows would overlap existing windows. The line indicates the Theil-Sen slope for each sequence of standard deviations.

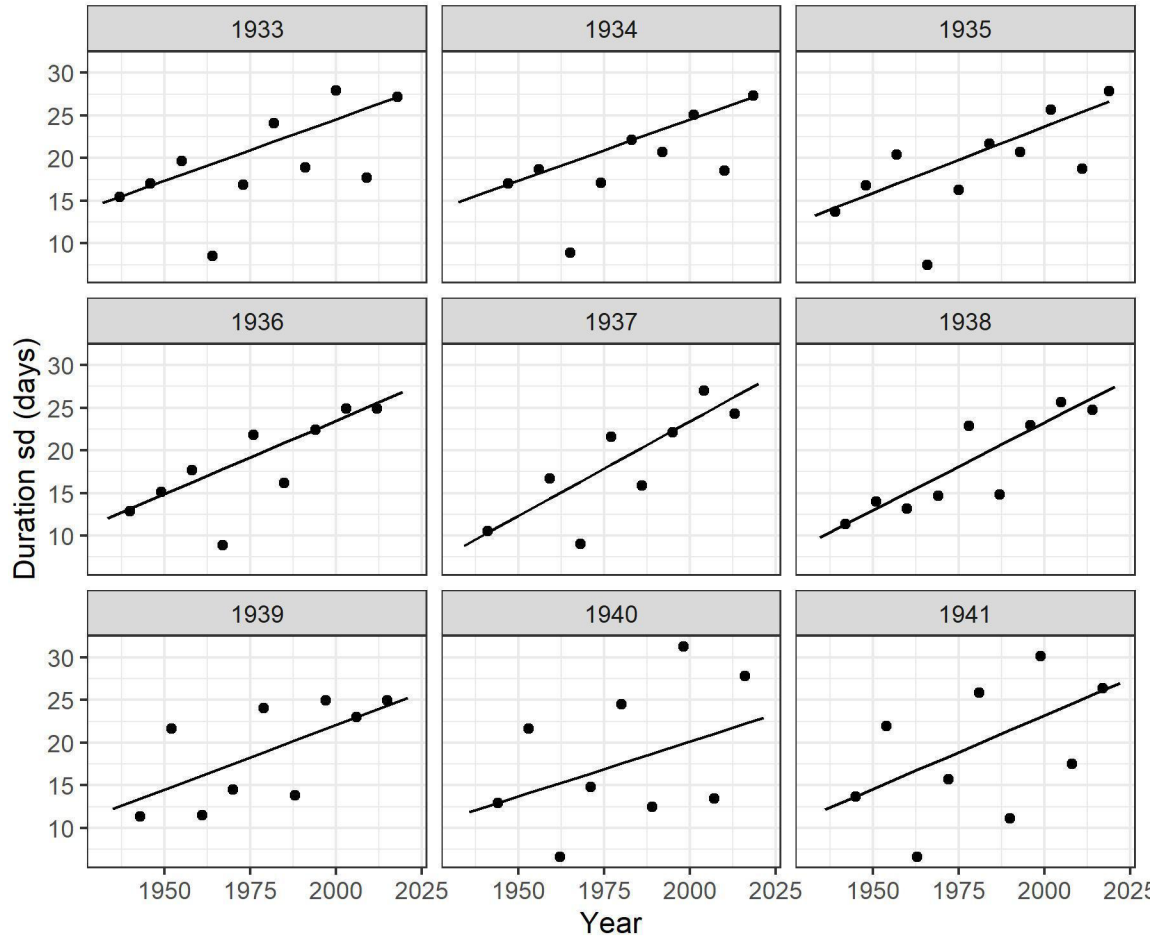

**Figure S2.** Standard deviations for all possible 9-year sequential windows where the year in each panel's title indicates the start year of the first segment. Additional sequential windows would overlap existing windows. The line indicates the Theil-Sen slope for each sequence of standard deviations.

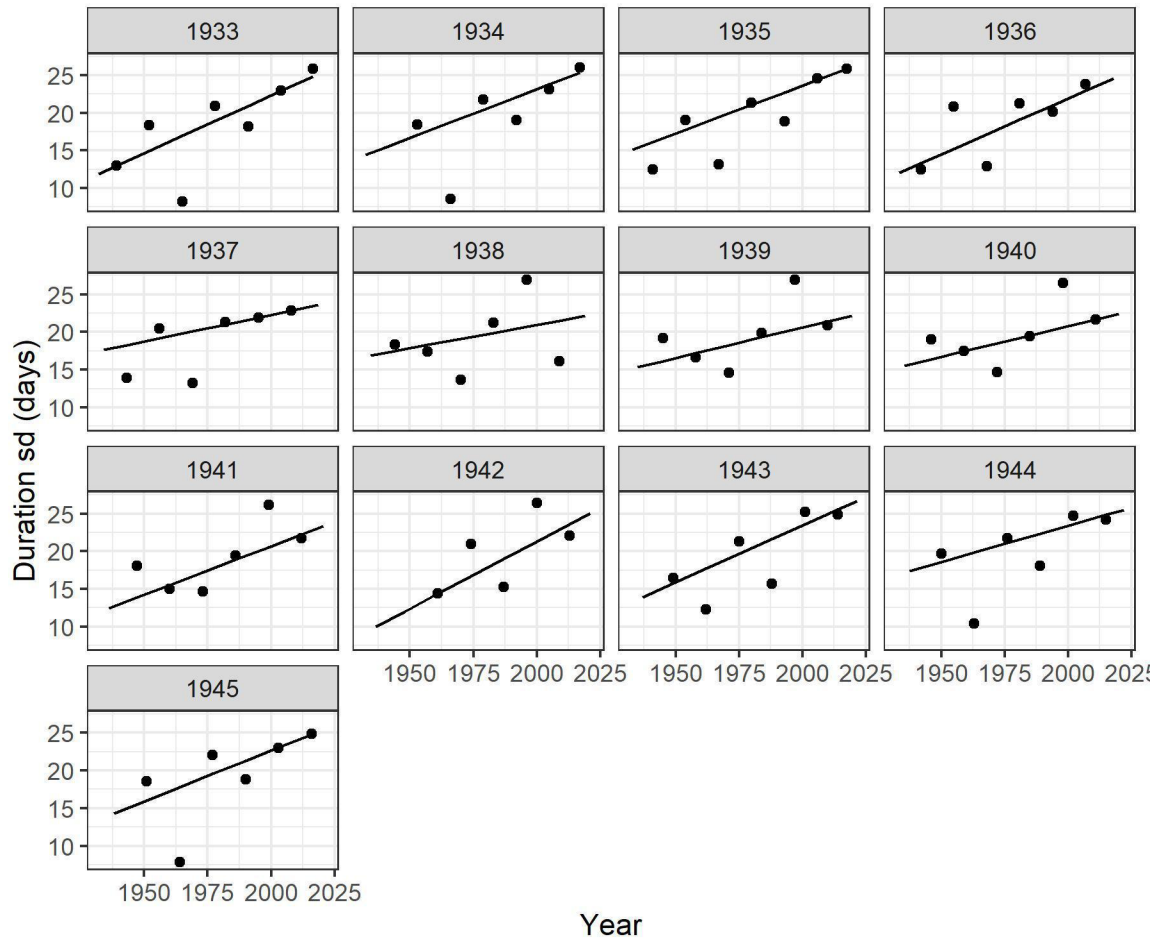

**Figure S3.** Standard deviations for all possible 13-year sequential windows where the year in each panel's title indicates the start year of the first segment. Additional sequential windows would overlap existing windows. The line indicates the Theil-Sen slope for each sequence of standard deviations.

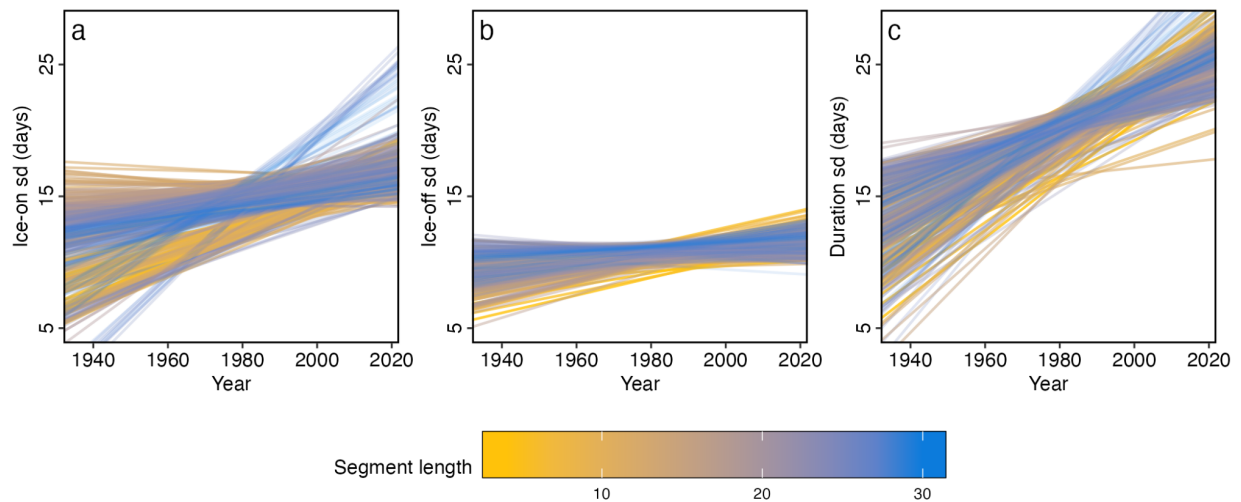

**Figure S4.** Theil-Sen slope fits for (a) ice-on standard deviation (sd), (b) ice-off sd, and (c)

duration sd compared across years of record (1931-2022). Sds were calculated from sequential windows of time across 4 to 30 years with color representing the sequential window length (segment length). For example, four year windows had four unique slopes (see Figure S1), 13-year sequential windows had 13 different slopes (see Figure S3), and 30 year windows had 30 different slopes. Overall, this resulted in 459 total best-fit lines in each panel.

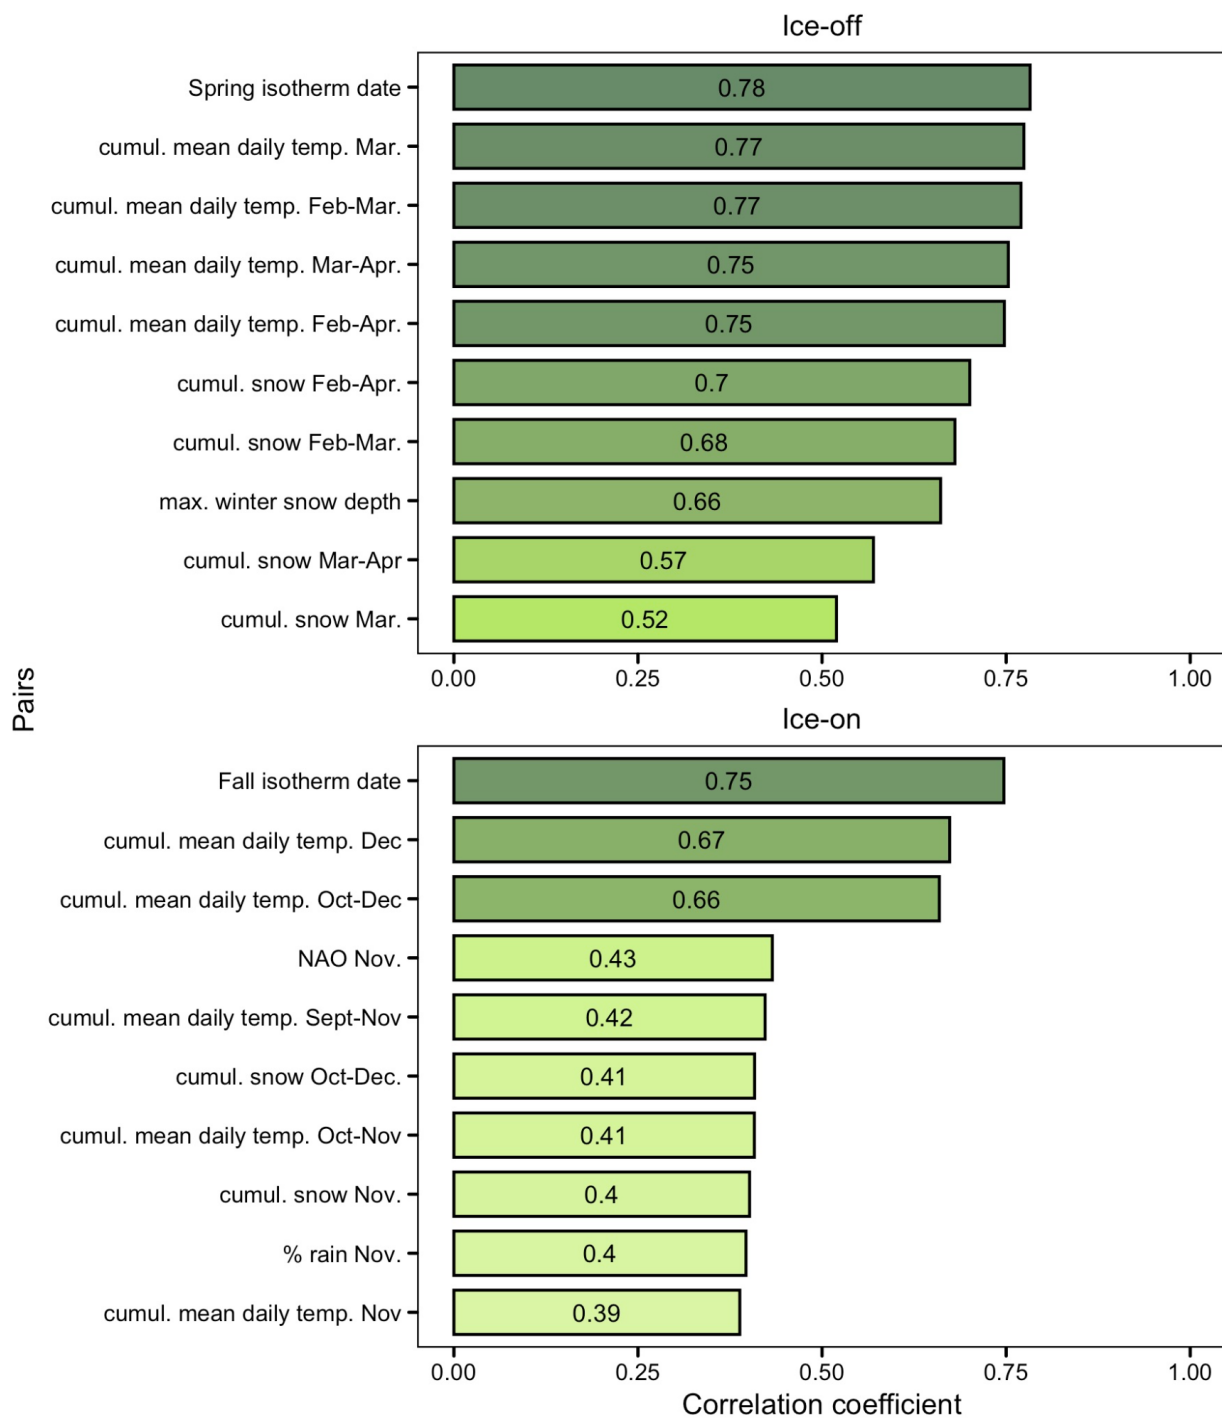

**Figure S5.** Pairwise correlation (Spearman's rho) between ice-off (top panel) and ice-on (bottom panel) and variation meteorological variables ranked in order from strongest to weakest. Prior to building the models, we tested for collinearity among the variables. For collinear pairs with correlation  $>|0.7|$ , we chose the variable with the higher correlation strength with ice-on or ice-off date.

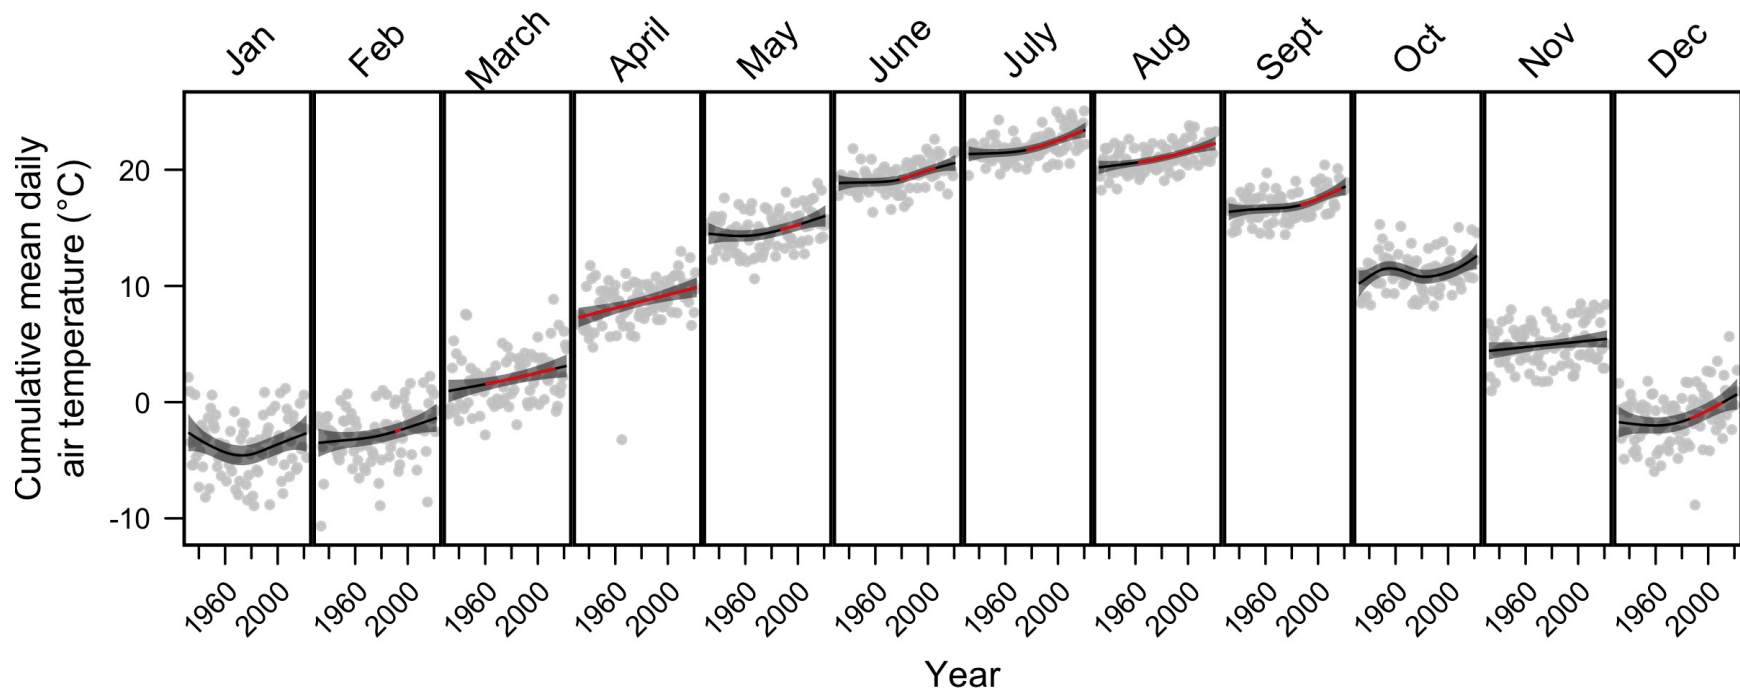

**Figure S6.** Cumulative mean daily air temperatures at Mohonk Lake between 1932 and 2022. Grey points are raw data and lines are a fitted trend. Shading around trend shows 95% confidence intervals. Red lines indicate periods of a significant temperature increase as indicated by the first derivative of the generalized additive model.

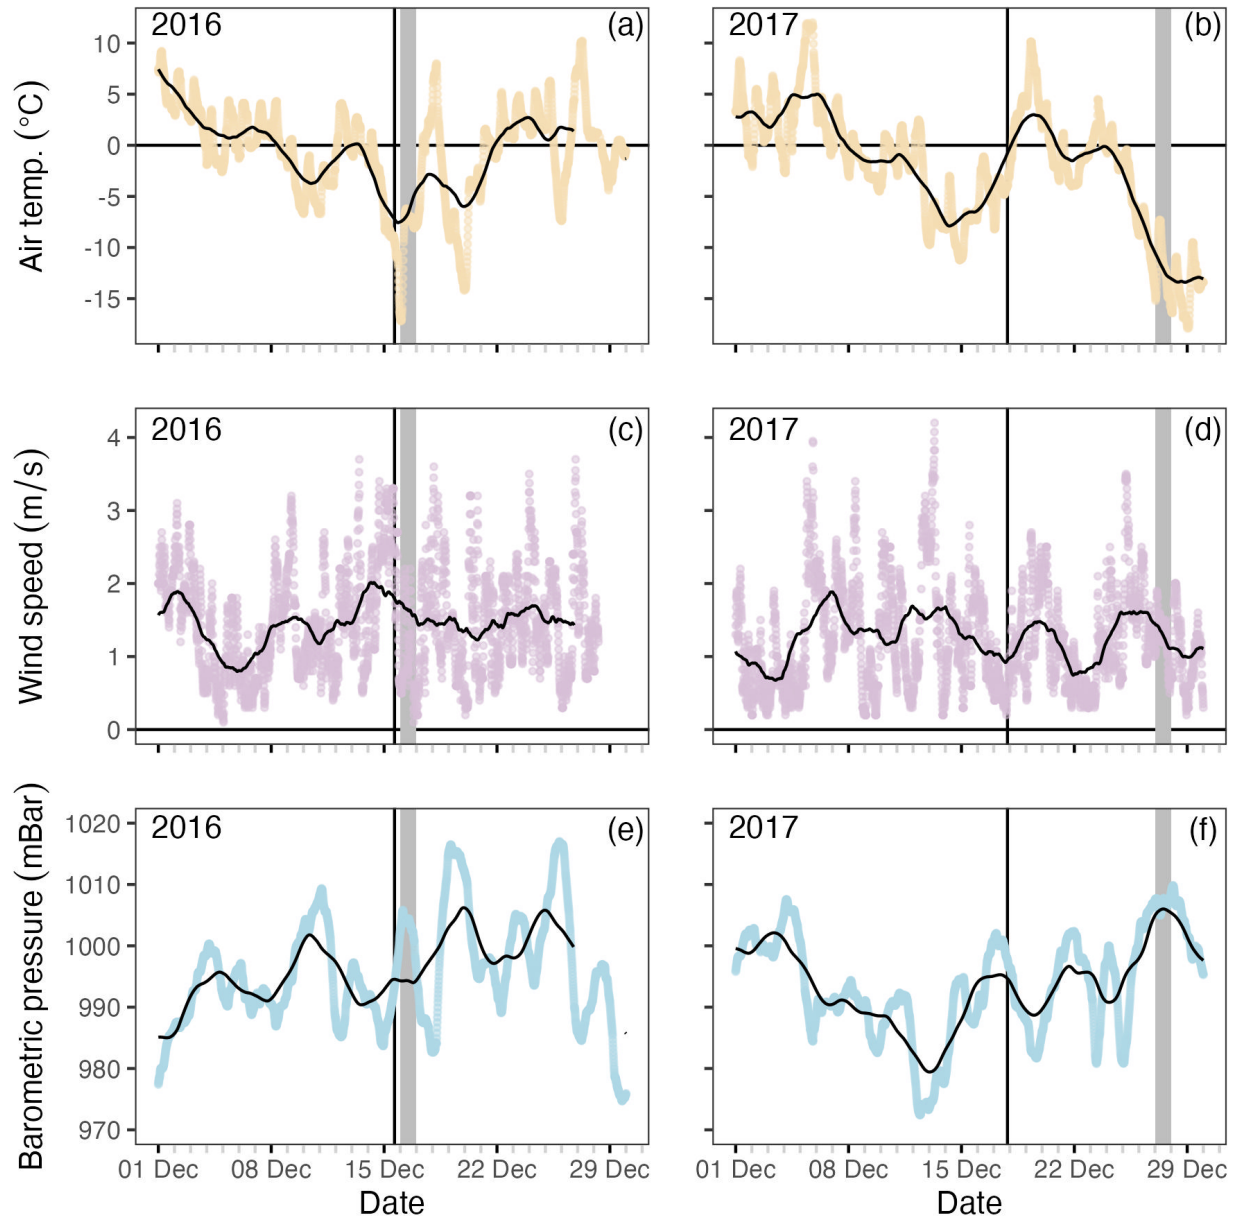

**Figure S7.** Meteorological data for the beginning of winter in 2016 (a, c, e) and 2017 (b, d, f) for air temperature (top row), wind speed (middle row), and barometric pressure (bottom row). The black line is the 3 day moving average. The vertical black line is ice-on identified by high-frequency temperature differences between 0 m and 9 m temperature sensors. The grey bar indicates the day (full 24-hour period) identified from visual assessment as the first day of the winter with 100% ice cover.



**Table S1.** List of top 3 GAMs fitted to ice-on and ice-off date. Model complexity (EDF; effective degrees of freedom) and AIC scores are shown for each model. The models highlighted in the text are ranked #1 and model summaries are contained in supplemental Table S2.

| <b>Response</b>  | <b>Predictors</b>                                                                                                                          | <b>EDF</b> | <b>AIC</b> | <b>Rank</b> | <b>% Dev. explained</b> |
|------------------|--------------------------------------------------------------------------------------------------------------------------------------------|------------|------------|-------------|-------------------------|
| Ice on date      | Fall isotherm date,<br>Cumulative mean daily temp. Nov.                                                                                    | 3.6        | 461.8      | 1           | 67.7%                   |
| Ice on date      | Fall isotherm date                                                                                                                         | 2.0        | 478.9      | 2           | 56.4%                   |
| Ice on date      | Cumulative mean daily air temp. Nov,<br>Cumulative mean daily air temp. Dec<br>November NAO index                                          | 4.0        | 546.7      | 3           | 57.9%                   |
|                  |                                                                                                                                            |            |            |             |                         |
| Ice off date (9) | Cumulative mean daily air temp. February,<br>Spring isotherm date,<br>Cumulative snowfall Feb.-Apr.,<br>Ice in day of year                 | 6.9        | 461.5      | 1           | 81.2%                   |
| Ice off date (7) | Cumulative mean daily air temp. February,<br>Cumulative mean daily air temp. March,<br>Cumulative snowfall Feb.-Apr.<br>Ice in day of year | 9.0        | 469.5      | 2           | 80.4%                   |
| Ice off date (8) | Cumulative mean daily temp. Feb.-Mar.,<br>Cumulative snowfall Feb.-Apr.,<br>Ice in day of year                                             | 8.2        | 473.3      | 3           | 78.8%                   |

**Table S2.** Top ranking model summary for ice on date and ice off date.

|                     |                                  | <b>Estimate</b> | <b>Est. df.</b> | <b>Ref. df</b> | <b>Chi.sq</b> | <b>F</b> | <b>p-value</b> |
|---------------------|----------------------------------|-----------------|-----------------|----------------|---------------|----------|----------------|
| <b>Ice duration</b> | Intercept                        | 97.6            |                 |                |               |          |                |
|                     | Global temperature anomaly       |                 | 1.0             | 1.0            | 11.4          | -        | < 0.001        |
|                     | NAO index Nov.                   |                 | 1.0             | 1.1            | 3.2           | -        | 0.082          |
|                     | NAO index Dec.                   |                 | 1.0             | 1.0            | 3.7           | -        | 0.054          |
| <b>Ice-on date</b>  | Intercept                        | 4.4             |                 |                |               |          |                |
|                     | Fall isotherm date               |                 | 1.0             | 1.0            | -             | 110.4    | < 0.001        |
|                     | Cumulative mean daily temp. Nov. |                 | 1.6             | 1.9            | -             | 11.8     | < 0.001        |
| <b>Ice-off date</b> | Intercept                        | 95.7            |                 |                |               |          |                |
|                     | Cumulative mean daily temp. Feb. |                 | 1.0             | 1.0            | -             | 16.9     | < 0.001        |
|                     | Spring isotherm date             |                 | 1.0             | 1.0            | -             | 74.9     | < 0.001        |
|                     | Cumulative snow Feb-Apr.         |                 | 2.8             | 3.6            | -             | 8.4      | < 0.001        |
|                     | Ice-on day of year               |                 | 1.0             | 1.0            | -             | 1.8      | 0.18           |

**Table S3.** Sens slopes on all the computed climatic variables for Mohonk Lake. We computed Sens slopes for all monthly and seasonal ENSO and NAO variables, but all Sens slope p-values were > 0.05 and therefore not printed in this table.

\*\*\* p < 0.001; \*\* p < 0.01; \* p < 0.05.

| <b>Climatic variable</b>                              | <b>p-value</b> | <b>Slope</b> | <b>Intercept</b> | <b>z-statistic</b> |
|-------------------------------------------------------|----------------|--------------|------------------|--------------------|
| Global temp. anomaly (°C)                             | <0.001***      | 0.0112       | -21.8            | 9.93               |
| Date of maximum snowfall                              | 0.8183         | 0.167        | -186             | 0.23               |
| Maximum snow depth (mm)                               | 0.7162         | -2.21        | 4870-            | -0.363             |
| Sept. cumulative snow (mm)                            | 1              | 0            | 0                | 0                  |
| Sept.-Nov. cumulative rain (mm)                       | 0.114          | 0.865        | -1400            | 1.58               |
| Sept.-Nov. number of days mean daily air T below zero | 0.0558         | -0.0217      | 47.2             | -1.91              |
| Sept.-Nov. number of days min daily air T below zero  | 0.18           | -0.0294      | 71.4             | -1.33              |
| Sept.-Oct. number of days min daily air T below zero  | 0.2657         | 0            | 1                | -1.11              |
| Sept.-Nov. cumulative mean daily air temp. (°C)       | 0.0013**       | 1.35         | -1650            | 3.23               |
| Sept.-Nov. cumulative snow (mm)                       | 0.261          | -0.334       | 715              | -1.12              |
| Sept.-Oct. cumulative mean daily air temp. (°C)       | 0.0007***      | 0.978        | -1070            | 3.39               |
| Sept.-Oct. cumulative rain (mm)                       | 0.0347*        | 0.975        | -1730            | 2.11               |
| Sept.-Oct. cumulative snow (mm)                       | 0.9583         | 0            | 0                | -0.05              |
| Sept. cumulative mean daily air temp. (°C)            | 0.0001***      | 0.644        | -760             | 3.9                |

| <b>Climatic variable</b>                             | <b>p-value</b> | <b>Slope</b> | <b>Intercept</b> | <b>z-statistic</b> |
|------------------------------------------------------|----------------|--------------|------------------|--------------------|
| Sept. cumulative rain (mm)                           | 0.221          | 0.371        | -631             | 1.22               |
| Oct cumulative mean daily air temp. (°C)             | 0.0984         | 0.323        | -294             | 1.65               |
| Oct.-Dec cumulative mean daily air temp. (°C)        | 0.0098**       | 1.32         | -2170            | 2.58               |
| Oct.-Dec. cumulative rain (mm)                       | 0.0362*        | 0.957        | -1590            | 2.09               |
| Oct.-Dec. cumulative snow (mm)                       | 0.805          | -0.526       | 1460             | 0.247              |
| Oct.-Dec. number of days mean daily air T below zero | 0.0058**       | -0.087       | 196              | -2.76              |
| Oct.-Dec. number of days min daily air T below zero  | 0.097          | -0.0496      | 138              | -1.66              |
| Oct.-Nov cumulative mean daily air temp. (°C)        | 0.0378*        | 0.677        | -843             | 2.08               |
| Oct.-Nov. cumulative rain (mm)                       | 0.084          | 0.578        | -938             | 1.73               |
| Oct.-Nov. number of days mean daily air T below zero | 0.0515         | -0.0204      | 44.6             | -1.95              |
| Oct.-Nov. number of days min daily air T below zero  | 0.1649         | -0.0294      | 71.5             | -1.39              |
| Oct. % of precipitation as rain                      | 0.9397         | 0            | 100              | -0.07              |
| Oct. cumulative rain (mm)                            | 0.0126*        | 0.615        | -1.12e+03        | 2.5                |
| Oct. cumulative snow (mm)                            | 0.9934         | 0            | 0                | -0.0083            |
| Oct. number of days min daily air T below zero       | 0.0265*        | 0            | 1                | -2.22              |
| Oct.-Nov. cumulative snow (mm)                       | 0.1598         | -0.406       | 852              | -1.41              |

| <b>Climatic variable</b>                        | <b>p-value</b> | <b>Slope</b> | <b>Intercept</b> | <b>z-statistic</b> |
|-------------------------------------------------|----------------|--------------|------------------|--------------------|
| Nov cumulative mean daily air temp. (°C)        | 0.1664         | 0.331        | -510             | 1.38               |
| Nov. % of precipitation as rain                 | 0.0362*        | 0.184        | -293             | 2.09               |
| Nov. cumulative rain (mm)                       | 0.715          | -0.0768      | 251              | -0.365             |
| Nov. cumulative snow (mm)                       | 0.0473         | -0.305       | 651              | -1.98              |
| Nov. number of days mean daily air T below zero | 0.0608         | -0.0184      | 40.6             | -1.88              |
| Nov. number of days min daily air T below zero  | 0.3148         | -0.0177      | 47.2             | -1.01              |
| Dec. % of precipitation as rain                 | 0.7778         | 0.0176       | -9.63            | 0.282              |
| Dec. cumulative rain (mm)                       | 0.0143*        | 0.459        | -804             | 2.45               |
| Dec. cumulative snow (mm)                       | 0.3613         | 0.901        | -1.53e+03        | 0.913              |
| Fall isotherm date                              | 0.0292*        | 0.214        | -330             | 2.18               |
| Dec. number of days mean daily air T below zero | 0.005*         | -0.0714      | 159              | -2.81              |
| Dec. number of days min daily air T below zero  | 0.0725         | -0.0303      | 85.5             | -1.8               |
| Dec. cumulative mean daily air temp. (°C)       | 0.0024**       | 0.844        | -1.7e+03         | 3.04               |
| Jan cumulative rain (mm)                        | 0.4315         | 0.148        | -209             | 0.787              |
| Jan-Mar cumulative mean daily air temp. (°C)    | 0.0109*        | 1.54         | -3.19e+03        | 2.55               |
| Jan-Mar. cumulative rain (mm)                   | 0.333=91       | 0.407        | -535             | 0.956              |

| <b>Climatic variable</b>                            | <b>p-value</b> | <b>Slope</b> | <b>Intercept</b> | <b>z-statistic</b> |
|-----------------------------------------------------|----------------|--------------|------------------|--------------------|
| Jan-Mar. cumulative snow (mm)                       | 0.7551         | -0.788       | 2.56e+03         | -0.312             |
| Jan. % of precipitation as rain                     | 0.5261         | 0.0418       | 61.5             | 0.634              |
| Jan. cumulative mean daily air temp. (°C)           | 0.5817         | 0.228        | -571             | 0.551              |
| Jan. cumulative snow (mm)                           | 0.6469         | -0.473       | 1.29e+03         | -0.458             |
| Jan. number of days mean daily air T below zero     | 0.5515         | 0            | 24               | -0.596             |
| Jan. number of days min daily air T below zero      | 0.1582         | 0            | 29               | -1.41              |
| Feb cumulative mean daily air temp. (°C)            | 0.018*         | 0.639        | -1.34e+03        | 2.37               |
| Feb-Apr. cumulative mean daily air temp. (°C)       | <0.0001**<br>* | 2.59         | -4.88e+03        | 4.26               |
| Feb-Apr. cumulative rain (mm)                       | 0.6807         | 0.119        | 32.8             | 0.441              |
| Feb-Apr. cumulative snow (mm)                       | 0.6233         | -1.08        | 2.87e+03         | -0.491             |
| Feb-Mar cumulative mean daily air temp. (°C)        | 0.001**        | 1.59         | -3.17e+03        | 3.3                |
| Feb-Mar. cumulative rain (mm)                       | 0.7677         | 0.08         | -20.1            | 0.295              |
| Feb-Mar. cumulative snow (mm)                       | 0.9154         | -0.159       | 1.01e+03         | -0.106             |
| Feb-Mar. number of days mean daily air T above zero | 0.003**        | 0.0945       | -158             | 2.97               |
| Feb-Mar. number of days min daily air T above zero  | 0.0015***      | 0.0789       | -145             | 3.18               |

| <b>Climatic variable</b>                            | <b>p-value</b> | <b>Slope</b> | <b>Intercept</b> | <b>z-statistic</b> |
|-----------------------------------------------------|----------------|--------------|------------------|--------------------|
| Feb. % of precipitation as rain                     | 0.628          | 0.0204       | -22.2            | 0.484              |
| Feb. cumulative rain (mm)                           | 0.9102         | 0.0136       | 48.2             | 0.113              |
| Feb. cumulative snow (mm)                           | 0.5748         | -0.564       | 1.45e+03         | -0.561             |
| Feb. number of days mean daily air T below zero     | 0.0823         | -0.0348      | 88.5             | -1.74              |
| Feb. number of days min daily air T below zero      | 0.0098**       | -0.025       | 75.3             | -2.58              |
| Mar-Apr cumulative mean daily air temp. (°C)        | 0.0001***      | 1.79         | -3.21e+03        | 3.99               |
| Mar-Apr. cumulative rain (mm)                       | 0.548          | 0.196        | -197             | 0.601              |
| Mar-Apr. cumulative snow (mm)                       | 0.18           | -1.65        | 3.61e+03         | -1.34              |
| Mar-Apr. number of days mean daily air T above zero | 0.0039**       | 0.0625       | -73.9            | 2.98               |
| Mar-Apr. number of days min daily air T above zero  | 0.0026***      | 0.0816       | -129             | 3.01               |
| Mar. % of precipitation as rain                     | 0.4984         | 0.0429       | -59.1            | 0.667              |
| Spring isotherm date                                | 0.0008***      | -0.144       | 476              | -3.36              |
| Mar. cumulative mean daily air temp. (°C)           | 0.0024**       | 0.935        | -1.79e+03        | 3.04               |
| Mar. cumulative rain (mm)                           | 0.4219         | 0.152        | -204             | 0.803              |
| Mar. cumulative snow (mm)                           | 0.7324         | -0.286       | 849              | -0.342             |
| Mar. number of days mean daily air T above zero     | 0.0045**       | 0.0603       | -99.3            | 2.84               |

| <b>Climatic variable</b>                        | <b>p-value</b> | <b>Slope</b> | <b>Intercept</b> | <b>z-statistic</b> |
|-------------------------------------------------|----------------|--------------|------------------|--------------------|
| Mar. number of days mean daily air T below zero | 0.0045**       | -0.0603      | 130              | -2.84              |
| Mar. number of days min daily air T above zero  | 0.0232**       | 0.0463       | -83.2            | 2.27               |
| Mar. number of days min daily air T below zero  | 0.0232**       | -0.0463      | 114              | -2.27              |
| Apr. % of precipitation as rain                 | 0.0654         | 0            | 85.9             | 1.84               |
| Apr. cumulative mean daily air temp. (°C)       | 0.0001***      | 0.978        | -1.67e+03        | 4.04               |
| Apr. cumulative rain (mm)                       | 0.926          | -0.0272      | 158              | -0.0929            |
| Apr. cumulative snow (mm)                       | 0.0659         | 0            | 12.7             | -1.84              |
| Apr. number of days mean daily air T below zero | 0.1521         | 0            | 0                | -1.43              |
| Apr. number of days min daily air T below zero  | 0.0044**       | -0.04        | 84.8             | -2.85              |



**Table S4.** Structural equation model fits. Relationship indicates the type of relationship (covariance or regression) for each variable with the variable (indented) below. For regression, variables indicate response variable (non-indented) and predictor variable or intercept (indented). For each relationship, an estimate of fit (Estimate), standard error of the estimate (Estimate SE), test-statistic (Z statistic) and p-value are included.

| <b>Variables</b>                       | <b>Relationship</b> | <b>Estimate</b> | <b>Estimate SE</b> | <b>Z statistic</b> | <b>p-value</b> |
|----------------------------------------|---------------------|-----------------|--------------------|--------------------|----------------|
| Ice-on date                            |                     |                 |                    |                    |                |
| Fall mixed period (d)                  | Covariance          | 0.84            | 0.26               | 3.16               | 0.002          |
| Under ice shallow (°C)                 |                     |                 |                    |                    |                |
| Ice-on date                            | Regression          | -0.23           | 0.19               | -1.20              | 0.229          |
| Intercept                              | Regression          | 0.09            | 0.19               | 0.47               | 0.637          |
| Under ice deep (°C)                    |                     |                 |                    |                    |                |
| Ice-on date                            | Regression          | -0.43           | 0.17               | -2.52              | 0.012          |
| Intercept                              | Regression          | 0.10            | 0.17               | 0.60               | 0.549          |
| Under ice deep (°C)                    |                     |                 |                    |                    |                |
| Under ice shallow (°C)                 | Covariance          | 0.70            | 0.22               | 3.26               | 0.001          |
| Density $\Delta$ (kg m <sup>-3</sup> ) |                     |                 |                    |                    |                |
| Under ice deep (°C)                    | Regression          | -0.87           | 0.36               | -2.42              | 0.016          |
| Under ice shallow (°C)                 | Regression          | 1.27            | 0.35               | 3.58               | <0.001         |
| Intercept                              | Regression          | 0.01            | 0.16               | 0.03               | 0.974          |
| Heat content (MJ)                      |                     |                 |                    |                    |                |
| Under ice deep (°C)                    | Regression          | 0.43            | 0.03               | 14.52              | <0.001         |
| Under ice shallow (°C)                 | Regression          | 0.61            | 0.03               | 19.13              | <0.001         |
| Density $\Delta$ (kg m <sup>-3</sup> ) | Regression          | -0.05           | 0.01               | -3.09              | 0.002          |
| Intercept                              | Regression          | 0.01            | 0.01               | 0.59               | 0.557          |
| Ice-off date                           |                     |                 |                    |                    |                |
| Density $\Delta$ (kg m <sup>-3</sup> ) | Regression          | -0.12           | 0.23               | -0.50              | 0.614          |
| Under ice shallow (°C)                 | Regression          | 0.00            | 1.68               | 0.00               | 0.999          |
| Under ice deep (°C)                    | Regression          | 0.87            | 1.20               | 0.73               | 0.466          |
| Heat content (MJ)                      | Regression          | -0.81           | 2.67               | -0.30              | 0.762          |
| Intercept                              | Regression          | 0.01            | 0.19               | 0.06               | 0.955          |
| Ice-off date                           |                     |                 |                    |                    |                |
| Spring mixed period (d)                | Covariance          | -0.49           | 0.20               | -2.43              | 0.015          |
